# Supplementary material for: Convolutional Neural Network for Segmenting Micro-X-ray Computed Tomography Images of Wood Cellular Structures
Source: MDPI journal article supplement (doi:10.3390/app13148146), 2023-07-13
Supplement: s1 [file s1]

Supplementary Materials for:

# Convolutional Neural Network for Segmenting Micro-X-Ray Computed Tomography Images of Wood Cellular Structures

Xavier Arzola-Villegas <sup>1,2</sup>, Carlos Báez <sup>3</sup>, Roderic Lakes <sup>4</sup>, Donald S. Stone <sup>1</sup>, Jane O'Dell <sup>2</sup>, Pavel Shevchenko <sup>5</sup>, Xianghui Xiao <sup>5,6</sup>, Francesco De Carlo <sup>5</sup> and Joseph E. Jakes <sup>2,\*</sup>

<sup>1</sup> Materials Science and Engineering, University of Wisconsin–Madison, Madison, WI 53706, USA

<sup>2</sup> Forest Biopolymers Science and Engineering, USDA Forest Service, Forest Products Laboratory, Madison, WI 53726, USA

<sup>3</sup> Analytical Chemistry and Microscopy Laboratory, USDA Forest Service, Forest Products Laboratory, Madison, WI 53726, USA

<sup>4</sup> Engineering Physics, University of Wisconsin–Madison, Madison, WI 53706, USA

<sup>5</sup> Advanced Photon Source, Argonne National Laboratory, Lemont, IL 60439, USA

<sup>6</sup> National Synchrotron Light Source II, Brookhaven National Laboratory, Upton, NY 11973, USA

\* Correspondence: joseph.e.jakes@usda.gov

## **Traditional Histogram-based Segmentation Methods**

For traditional histogram-based image segmentation methods to be successful, the histogram of a grayscale image containing different object classes would need to be multimodal with each class having a specific modal value. This multimodal histogram is exploited by traditional histogram-based image segmentation methods to gather the different objects into classes. As observed in the histograms in Figures 4c and d and the top of Figure S1, the histograms of the reconstructed grayscale  $\mu$ XCT images of wood in this work were not multimodal. Nevertheless, because of the simplicity of the traditional histogram-based thresholding, different thresholding methods were tested using the auto threshold plugin of ImageJ (Schneider et al. 2012) as shown in Figure S1. Traditional threshold methods did not perform well. In general, the histogram-based thresholding methods were able to segment the edges of the sample. However, often the interior pixels of the sample were misclassified. It can be observed that qualitatively the U-Net CNN segmentation developed in this work is the closest to the ground-truth image.

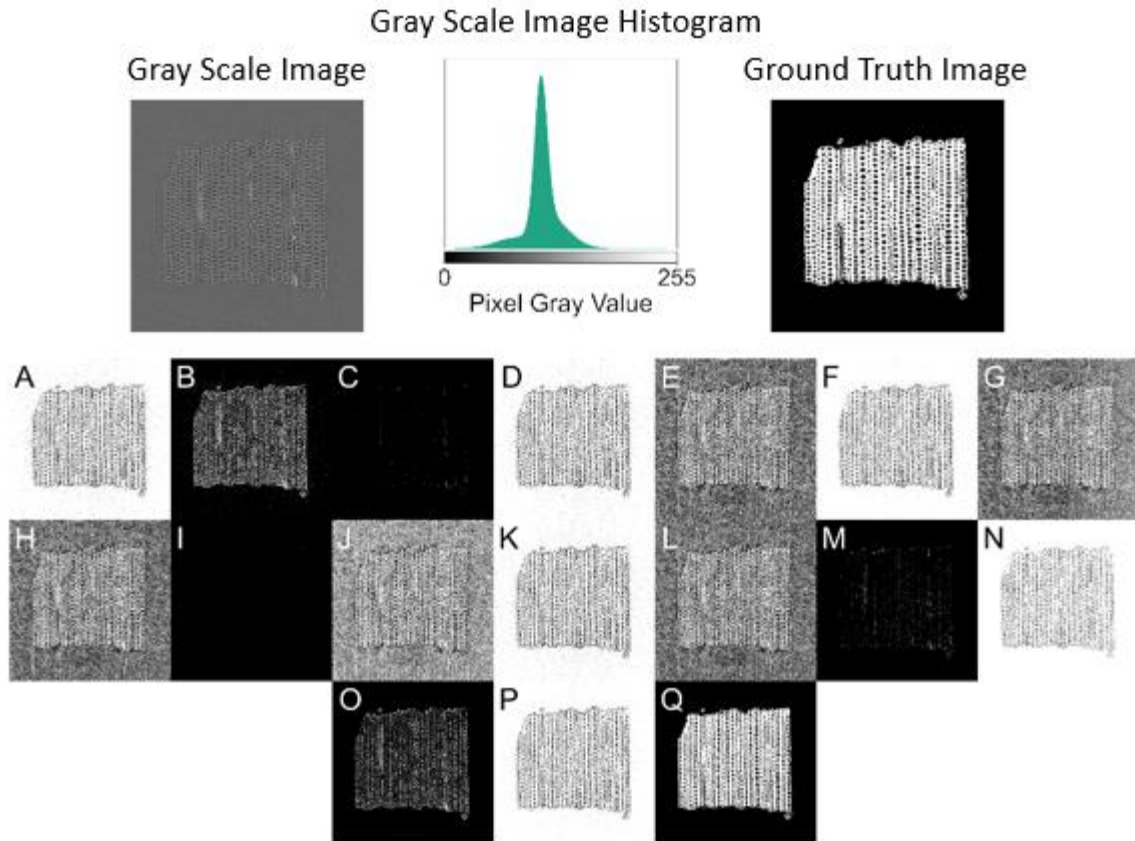

**Figure S1:** Binary image comparison between different histogram-based thresholding segmentation methods and the modified U-net CNN developed in this work. At the top, the original gray-scale image with the histogram and the ground-truth image are shown. At the bottom the different segmentation methods are shown: A) Default, B) Huang (Huang and Wang 1995), C) Intermodes (Prewitt and Mendelsohn 1966), D) Isodata (Ridler and Calvard 1978), E) Li Minimum Cross Entropy (Li and Lee 1993), F) Maximum Entropy (Kapur et al. 1985), G) Mean of Grey Levels (Glasbey 1993), H) Minimum Error (Kittler and Illingworth 1986), I) Minimum of Grey Values (Prewitt and Mendelsohn 1966), J) Moments (Tsai 1985), K) Otsu (Otsu 1979), L) Percentile (Doyle 1962), M) Renyi Entropy (Kapur et al. 1985), N) Shanbhag (Shanbhag 1994), O) Triangle (Zack et al. 1977), P) Yen (Yen et al. 1995), Q) U-Net (Ronneberger et al. 2015).

A more complex segmentation method that has been used to segment  $\mu$ XCT images of wood is the Gaussian mixture model (Jakes et al. 2019; McKinley et al. 2016). In the Gaussian mixture model the histogram is fit to a series of Gaussian distributions. The number of Gaussian distributions corresponds to the expected number of object classes in the image. For the wood  $\mu$ XCT images in this study, two object classes corresponding to cell wall and air would be expected. Unfortunately, the characteristic histograms of the full gray-scale images could not be properly fitted with two Gaussians. Nevertheless, we partitioned the images into a sub region that was located inside of the wood (**Figure S2**). In the sub region, the peaks of each phase were better defined in the histogram with a main peak and more obvious shoulder. The fitted Gaussian peaks are shown in Figure S2. However, the overlap between the valleys

reduced the segmentation accuracy. It can be seen in the mixture model binary image that pixels corresponding to air were assigned to the cell wall.

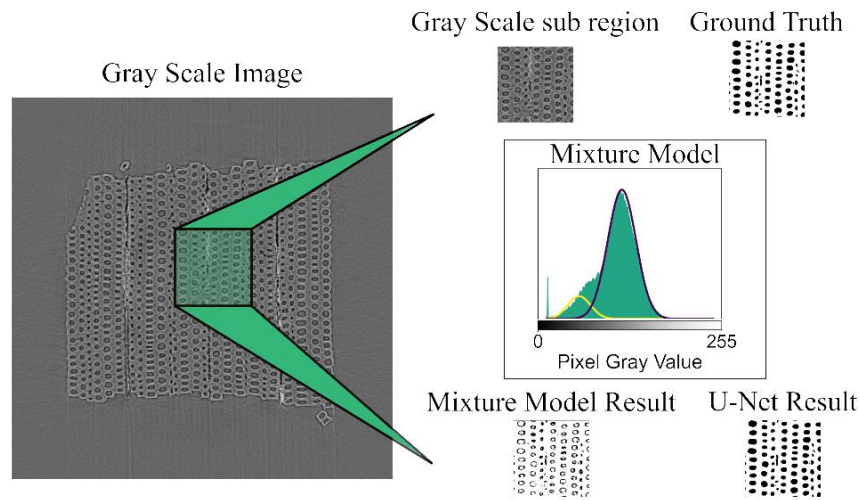

**Figure S2:** Gaussian Mixture Model segmentation method of image sub region compared to U-Net segmentation.

We also used the IoU metric (Equation 1) to quantitatively compare the results from the different histogram-based segmentation methods with the U-Net CNN segmentation. As shown in **Figure S3**, most histogram-based segmentation methods scored an IoU between 30% and 50% and U-Net CNN scored an IoU of 96%. The IoU was also calculated for the sub region segmentations. The Gaussian mixture model scored an IoU of 84% in the sub region while U-Net CNN scored 98%. These results clearly demonstrate the need for the U-net CNN segmentation to reliably segment the fast propagation-based phase-contrast  $\mu$ XCT images of cellular materials like those of wood obtained in this study.

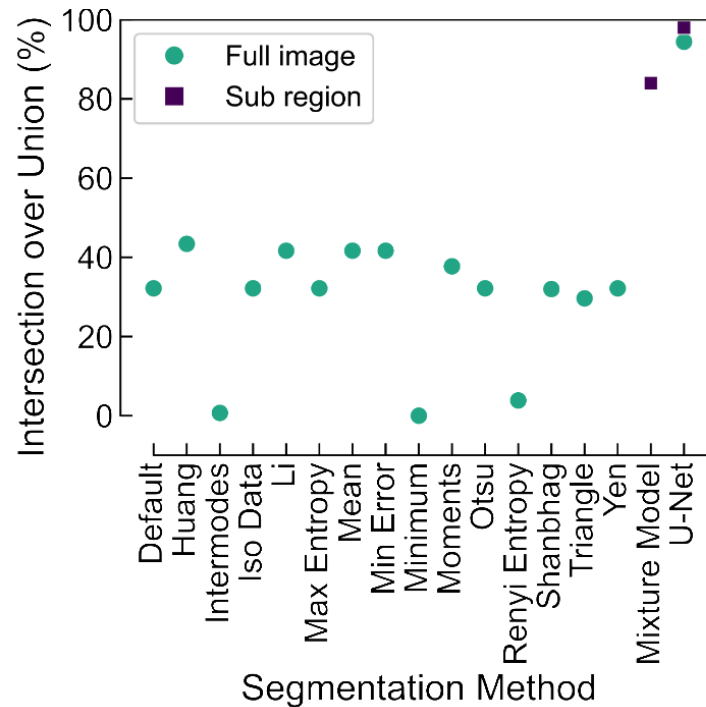

**Figure S3:** Scores of Intersection over Union (IoU) of the different segmentation methods.

## References

- Doyle, W. (1962). "Operations useful for similarity-invariant pattern recognition," *Journal of the ACM (JACM)*, ACM New York, NY, USA, 9(2), 259–267.
- Glasbey, C. A. (1993). "An Analysis of Histogram-Based Thresholding Algorithms," *CVGIP: Graphical Models and Image Processing*, 55(6), 532–537. DOI: <https://doi.org/10.1006/cgip.1993.1040>
- Huang, L.-K., and Wang, M.-J. J. (1995). "Image thresholding by minimizing the measures of fuzziness," *Pattern Recognition*, 28(1), 41–51. DOI: [https://doi.org/10.1016/0031-3203\(94\)E0043-K](https://doi.org/10.1016/0031-3203(94)E0043-K)
- Jakes, J. E., Frihart, C. R., Hunt, C. G., Yelle, D. J., Plaza, N. Z., Lorenz, L., Grigsby, W., Ching, D. J., Kamke, F., Gleber, S.-C., Vogt, S., and Xiao, X. (2019). "X-ray methods to observe and quantify adhesive penetration into wood," *Journal of Materials Science*, Springer US, 54(1), 705–718. DOI: 10.1007/s10853-018-2783-5
- Kapur, J. N., Sahoo, P. K., and Wong, A. K. C. (1985). "A new method for gray-level picture thresholding using the entropy of the histogram," *Computer Vision, Graphics, and Image Processing*, 29(3), 273–285. DOI: [https://doi.org/10.1016/0734-189X\(85\)90125-2](https://doi.org/10.1016/0734-189X(85)90125-2)
- Kittler, J., and Illingworth, J. (1986). "Minimum error thresholding," *Pattern Recognition*, 19(1), 41–47. DOI: [https://doi.org/10.1016/0031-3203\(86\)90030-0](https://doi.org/10.1016/0031-3203(86)90030-0)
- Li, C. H., and Lee, C. K. (1993). "Minimum cross entropy thresholding," *Pattern Recognition*, 26(4), 617–625. DOI: [https://doi.org/10.1016/0031-3203\(93\)90115-D](https://doi.org/10.1016/0031-3203(93)90115-D)
- McKinley, P. E., Ching, D. J., Kamke, F. A., Zauner, M., and Xiao, X. (2016). "Micro X-ray Computed Tomography of Adhesive Bonds in Wood," *Wood and Fiber Science*, The Society, 48, 2–16.

- Otsu, N. (1979). "A threshold selection method from gray-level histograms," *IEEE transactions on systems, man, and cybernetics*, IEEE, 9(1), 62–66.
- Prewitt, J. M. S., and Mendelsohn, M. L. (1966). "The analysis of cell images," *Annals of the New York Academy of Sciences*, Wiley Online Library, 128(3), 1035–1053.
- Ridler, T. W., and Calvard, S. (1978). "Picture Thresholding Using an Iterative Selection Method," *IEEE Transactions on Systems, Man, and Cybernetics*, 8(8), 630–632. DOI: 10.1109/TSMC.1978.4310039
- Ronneberger, O., Fischer, P., and Brox, T. (2015). "U-Net: Convolutional Networks for Biomedical Image Segmentation BT - Medical Image Computing and Computer-Assisted Intervention – MICCAI 2015," N. Navab, J. Hornegger, W. M. Wells, and A. F. Frangi, eds., Springer International Publishing, Cham, 234–241.
- Schneider, C. A., Rasband, W. S., and Eliceiri, K. W. (2012). "NIH Image to ImageJ: 25 years of image analysis," *Nature Methods*, 9(7), 671–675. DOI: 10.1038/nmeth.2089
- Shanbhag, A. G. (1994). "Utilization of Information Measure as a Means of Image Thresholding," *CVGIP: Graphical Models and Image Processing*, 56(5), 414–419. DOI: <https://doi.org/10.1006/cgip.1994.1037>
- Tsai, W.-H. (1985). "Moment-preserving thresholding: A new approach," *Computer Vision, Graphics, and Image Processing*, 29(3), 377–393. DOI: [https://doi.org/10.1016/0734-189X\(85\)90133-1](https://doi.org/10.1016/0734-189X(85)90133-1)
- Yen, J.-C., Chang, F.-J., and Chang, S. (1995). "A new criterion for automatic multilevel thresholding," *IEEE Transactions on Image Processing*, 4(3), 370–378. DOI: 10.1109/83.366472
- Zack, G. W., Rogers, W. E., and Latt, S. A. (1977). "Automatic measurement of sister chromatid exchange frequency.," *Journal of Histochemistry & Cytochemistry*, SAGE Publications Sage CA: Los Angeles, CA, 25(7), 741–753.
