# Supplementary material for: Convolutional Neural Network for Segmenting Micro-X-ray Computed Tomography Images of Wood Cellular Structures
Source: MDPI journal article supplement (doi:10.3390/app13148146), 2023-07-13
Supplement: s1 [file s1]

Archive with 1 entries (1 files):
- applsci-2482879-supplementary.pdf
